# Supplementary material for: Shedding light on the photophysical properties of iridium(iii) complexes with a dicyclometalated phosphate ligand via N-substitution from a theoretical viewpoint
Source: Royal Society of Chemistry journal article supplement (doi:10.1039/c6nj03617a), 2017-01-01
Supplement: c6nj03617a1.pdf [file c6nj03617a1.pdf]

## Supporting Information

### **Shedding light on the photophysical properties of iridium(III) complexes with a dicyclometalated phosphate ligand via N-substitution from a theoretical viewpoint†**

Xiaohong Shang,<sup>\* a</sup> Deming Han,<sup>b</sup> Defeng Zhou<sup>a</sup> and Gang Zhang<sup>c</sup>

<sup>a</sup> *College of Chemistry and Life Science, Changchun University of Technology, Changchun 130012, P.R. China.*

*E-mail: shangxiaohong58@aliyun.com*

<sup>b</sup> *School of Life Science and Technology, Changchun University of Science and Technology, Changchun 130022, P.R. China*

<sup>c</sup> *Institute of Theoretical Chemistry, Jilin University, Changchun 130023, P.R. China*

**Table S1** Frontier molecular orbital energies (eV) and compositions (%) in the ground state for complex **1**

| MO  | Energy | Contribution(%) |                               |                     |                  | Assign                                                                        |
|-----|--------|-----------------|-------------------------------|---------------------|------------------|-------------------------------------------------------------------------------|
|     |        | Ir              | P <sup>^</sup> C <sub>2</sub> | P(OPh) <sub>3</sub> | N <sup>^</sup> N |                                                                               |
| L+8 | -0.40  | 0               | 5                             | 95                  | 0                | $\pi^*(\text{P(OPh)}_3)$                                                      |
| L+7 | -0.42  | 2               | 64                            | 33                  | 1                | $\pi^*(\text{P}^{\wedge}\text{C}_2 + \text{P(OPh)}_3)$                        |
| L+6 | -0.43  | 1               | 20                            | 78                  | 1                | $\pi^*(\text{P}^{\wedge}\text{C}_2 + \text{P(OPh)}_3)$                        |
| L+5 | -0.53  | 2               | 69                            | 28                  | 1                | $\pi^*(\text{P}^{\wedge}\text{C}_2 + \text{P(OPh)}_3)$                        |
| L+4 | -0.56  | 3               | 33                            | 62                  | 1                | $\pi^*(\text{P}^{\wedge}\text{C}_2 + \text{P(OPh)}_3)$                        |
| L+3 | -0.61  | 15              | 39                            | 41                  | 5                | $d(\text{Ir}) + \pi^*(\text{P}^{\wedge}\text{C}_2 + \text{P(OPh)}_3)$         |
| L+2 | -0.69  | 7               | 18                            | 72                  | 3                | $\pi^*(\text{P}^{\wedge}\text{C}_2 + \text{P(OPh)}_3)$                        |
| L+1 | -1.24  | 1               | 1                             | 1                   | 98               | $\pi^*(\text{N}^{\wedge}\text{N})$                                            |
| L   | -1.87  | 2               | 1                             | 1                   | 95               | $\pi^*(\text{N}^{\wedge}\text{N})$                                            |
| H   | -6.47  | 22              | 73                            | 2                   | 3                | $d(\text{Ir}) + \pi(\text{P}^{\wedge}\text{C}_2)$                             |
| H-1 | -6.59  | 2               | 96                            | 1                   | 1                | $\pi(\text{P}^{\wedge}\text{C}_2)$                                            |
| H-2 | -6.98  | 13              | 60                            | 5                   | 22               | $d(\text{Ir}) + \pi(\text{P}^{\wedge}\text{C}_2 + \text{N}^{\wedge}\text{N})$ |
| H-3 | -7.07  | 1               | 89                            | 1                   | 8                | $\pi(\text{P}^{\wedge}\text{C}_2)$                                            |
| H-4 | -7.11  | 6               | 36                            | 2                   | 55               | $\pi(\text{P}^{\wedge}\text{C}_2 + \text{N}^{\wedge}\text{N})$                |
| H-5 | -7.21  | 0               | 1                             | 99                  | 0                | $\pi(\text{P(OPh)}_3)$                                                        |
| H-6 | -7.24  | 0               | 1                             | 97                  | 1                | $\pi(\text{P(OPh)}_3)$                                                        |
| H-7 | -7.49  | 0               | 99                            | 0                   | 1                | $\pi(\text{P}^{\wedge}\text{C}_2)$                                            |
| H-8 | -7.57  | 0               | 1                             | 98                  | 1                | $\pi(\text{P(OPh)}_3)$                                                        |

**Table S2** Frontier molecular orbital energies (eV) and compositions (%) in the ground state for complex **1a**

| MO  | Energy | Contribution(%) |                               |                     |                  | Assign                                                    |
|-----|--------|-----------------|-------------------------------|---------------------|------------------|-----------------------------------------------------------|
|     |        | Ir              | P <sup>^</sup> C <sub>2</sub> | P(OPh) <sub>3</sub> | N <sup>^</sup> N |                                                           |
| L+8 | -0.36  | 4               | 78                            | 17                  | 1                | π*( P <sup>^</sup> C <sub>2</sub> + P(OPh) <sub>3</sub> ) |
| L+7 | -0.39  | 0               | 5                             | 94                  | 0                | π*( P(OPh) <sub>3</sub> )                                 |
| L+6 | -0.41  | 0               | 2                             | 98                  | 0                | π*( P(OPh) <sub>3</sub> )                                 |
| L+5 | -0.49  | 2               | 76                            | 21                  | 1                | π*( P <sup>^</sup> C <sub>2</sub> + P(OPh) <sub>3</sub> ) |
| L+4 | -0.52  | 9               | 49                            | 39                  | 3                | π*( P <sup>^</sup> C <sub>2</sub> + P(OPh) <sub>3</sub> ) |
| L+3 | -0.59  | 7               | 20                            | 71                  | 2                | π*( P <sup>^</sup> C <sub>2</sub> + P(OPh) <sub>3</sub> ) |
| L+2 | -0.68  | 6               | 14                            | 78                  | 2                | π*( P <sup>^</sup> C <sub>2</sub> + P(OPh) <sub>3</sub> ) |
| L+1 | -1.84  | 0               | 0                             | 0                   | 99               | π*( N <sup>^</sup> N)                                     |
| L   | -2.27  | 3               | 1                             | 1                   | 95               | π*( N <sup>^</sup> N)                                     |
| H   | -6.47  | 19              | 77                            | 2                   | 3                | d(Ir)+π(P <sup>^</sup> C <sub>2</sub> )                   |
| H-1 | -6.58  | 5               | 93                            | 1                   | 1                | π(P <sup>^</sup> C <sub>2</sub> )                         |
| H-2 | -6.98  | 2               | 89                            | 6                   | 4                | π(P <sup>^</sup> C <sub>2</sub> )                         |
| H-3 | -7.07  | 2               | 95                            | 1                   | 2                | π(P <sup>^</sup> C <sub>2</sub> )                         |
| H-4 | -7.21  | 0               | 1                             | 99                  | 0                | π(P(OPh) <sub>3</sub> )                                   |
| H-5 | -7.23  | 1               | 4                             | 92                  | 3                | π(P(OPh) <sub>3</sub> )                                   |
| H-6 | -7.33  | 12              | 13                            | 10                  | 66               | π(N <sup>^</sup> N)                                       |
| H-7 | -7.44  | 0               | 98                            | 0                   | 2                | π(P <sup>^</sup> C <sub>2</sub> )                         |
| H-8 | -7.57  | 0               | 1                             | 98                  | 0                | π(P(OPh) <sub>3</sub> )                                   |

**Table S3** Frontier molecular orbital energies (eV) and compositions (%) in the ground state for complex **1b**

| MO  | Energy | Contribution(%) |                               |                     |                  | Assign                                   |
|-----|--------|-----------------|-------------------------------|---------------------|------------------|------------------------------------------|
|     |        | Ir              | P <sup>^</sup> C <sub>2</sub> | P(OPh) <sub>3</sub> | N <sup>^</sup> N |                                          |
| L+8 | -0.41  | 0               | 11                            | 88                  | 0                | $\pi^*(P^{\wedge}C_2 + P(OPh)_3)$        |
| L+7 | -0.42  | 2               | 72                            | 25                  | 1                | $\pi^*(P^{\wedge}C_2 + P(OPh)_3)$        |
| L+6 | -0.44  | 0               | 8                             | 92                  | 0                | $\pi^*(P(OPh)_3)$                        |
| L+5 | -0.53  | 1               | 85                            | 13                  | 0                | $\pi^*(P^{\wedge}C_2 + P(OPh)_3)$        |
| L+4 | -0.57  | 3               | 13                            | 83                  | 1                | $\pi^*(P(OPh)_3)$                        |
| L+3 | -0.65  | 13              | 31                            | 52                  | 4                | d(Ir)+ $\pi^*(P^{\wedge}C_2 + P(OPh)_3)$ |
| L+2 | -0.72  | 13              | 27                            | 55                  | 5                | d(Ir)+ $\pi^*(P^{\wedge}C_2 + P(OPh)_3)$ |
| L+1 | -1.53  | 1               | 1                             | 1                   | 98               | $\pi^*(N^{\wedge}N)$                     |
| L   | -2.30  | 2               | 1                             | 1                   | 96               | $\pi^*(N^{\wedge}N)$                     |
| H   | -6.53  | 21              | 76                            | 2                   | 2                | d(Ir)+ $\pi(P^{\wedge}C_2)$              |
| H-1 | -6.63  | 2               | 95                            | 1                   | 1                | $\pi(P^{\wedge}C_2)$                     |
| H-2 | -7.04  | 1               | 90                            | 7                   | 3                | $\pi(P^{\wedge}C_2)$                     |
| H-3 | -7.11  | 2               | 96                            | 1                   | 2                | $\pi(P^{\wedge}C_2)$                     |
| H-4 | -7.23  | 0               | 1                             | 99                  | 0                | $\pi(P(OPh)_3)$                          |
| H-5 | -7.25  | 1               | 3                             | 95                  | 1                | $\pi(P(OPh)_3)$                          |
| H-6 | -7.37  | 13              | 13                            | 8                   | 66               | $\pi(N^{\wedge}N)$                       |
| H-7 | -7.51  | 0               | 99                            | 0                   | 1                | $\pi(P^{\wedge}C_2)$                     |
| H-8 | -7.59  | 0               | 2                             | 98                  | 0                | $\pi(P(OPh)_3)$                          |

**Table S4** Frontier molecular orbital energies (eV) and compositions (%) in the ground state for complex **1c**

| MO  | Energy | Contribution(%) |                               |                     | Assign |                                                                       |
|-----|--------|-----------------|-------------------------------|---------------------|--------|-----------------------------------------------------------------------|
|     |        | Ir              | P <sup>^</sup> C <sub>2</sub> | P(OPh) <sub>3</sub> |        | N <sup>^</sup> N                                                      |
| L+8 | -0.42  | 0               | 4                             | 96                  | 0      | $\pi^*(\text{P(OPh)}_3)$                                              |
| L+7 | -0.44  | 1               | 41                            | 58                  | 0      | $\pi^*(\text{P}^{\wedge}\text{C}_2 + \text{P(OPh)}_3)$                |
| L+6 | -0.45  | 1               | 47                            | 51                  | 1      | $\pi^*(\text{P}^{\wedge}\text{C}_2 + \text{P(OPh)}_3)$                |
| L+5 | -0.55  | 1               | 81                            | 18                  | 0      | $\pi^*(\text{P}^{\wedge}\text{C}_2)$                                  |
| L+4 | -0.59  | 3               | 17                            | 80                  | 1      | $\pi^*(\text{P(OPh)}_3)$                                              |
| L+3 | -0.67  | 12              | 27                            | 58                  | 4      | $d(\text{Ir}) + \pi^*(\text{P}^{\wedge}\text{C}_2 + \text{P(OPh)}_3)$ |
| L+2 | -0.74  | 16              | 32                            | 46                  | 6      | $d(\text{Ir}) + \pi^*(\text{P}^{\wedge}\text{C}_2 + \text{P(OPh)}_3)$ |
| L+1 | -1.57  | 0               | 1                             | 1                   | 98     | $\pi^*(\text{N}^{\wedge}\text{N})$                                    |
| L   | -2.41  | 2               | 1                             | 1                   | 95     | $\pi^*(\text{N}^{\wedge}\text{N})$                                    |
| H   | -6.55  | 20              | 76                            | 2                   | 2      | $d(\text{Ir}) + \pi(\text{P}^{\wedge}\text{C}_2)$                     |
| H-1 | -6.64  | 3               | 95                            | 1                   | 1      | $\pi(\text{P}^{\wedge}\text{C}_2)$                                    |
| H-2 | -7.04  | 2               | 84                            | 7                   | 8      | $\pi(\text{P}^{\wedge}\text{C}_2)$                                    |
| H-3 | -7.12  | 2               | 94                            | 1                   | 3      | $\pi(\text{P}^{\wedge}\text{C}_2)$                                    |
| H-4 | -7.23  | 2               | 4                             | 80                  | 15     | $\pi(\text{P(OPh)}_3)$                                                |
| H-5 | -7.24  | 5               | 13                            | 43                  | 39     | $\pi(\text{P(OPh)}_3 + \text{N}^{\wedge}\text{N})$                    |
| H-6 | -7.28  | 2               | 2                             | 76                  | 21     | $\pi(\text{P(OPh)}_3 + \text{N}^{\wedge}\text{N})$                    |
| H-7 | -7.52  | 0               | 99                            | 0                   | 1      | $\pi(\text{P}^{\wedge}\text{C}_2)$                                    |
| H-8 | -7.59  | 0               | 1                             | 98                  | 0      | $\pi(\text{P(OPh)}_3)$                                                |

**Table S5** Frontier molecular orbital energies (eV) and compositions (%) in the ground state for complex **1d**

| MO  | Energy | Contribution(%) |                               |                     | Assign |                                                                       |
|-----|--------|-----------------|-------------------------------|---------------------|--------|-----------------------------------------------------------------------|
|     |        | Ir              | P <sup>^</sup> C <sub>2</sub> | P(OPh) <sub>3</sub> |        | N <sup>^</sup> N                                                      |
| L+8 | -0.42  | 0               | 3                             | 96                  | 0      | $\pi^*(\text{P(OPh)}_3)$                                              |
| L+7 | -0.44  | 1               | 37                            | 61                  | 0      | $\pi^*(\text{P}^{\wedge}\text{C}_2 + \text{P(OPh)}_3)$                |
| L+6 | -0.45  | 2               | 50                            | 47                  | 1      | $\pi^*(\text{P}^{\wedge}\text{C}_2 + \text{P(OPh)}_3)$                |
| L+5 | -0.55  | 1               | 77                            | 21                  | 1      | $\pi^*(\text{P}^{\wedge}\text{C}_2 + \text{P(OPh)}_3)$                |
| L+4 | -0.58  | 2               | 21                            | 76                  | 1      | $\pi^*(\text{P}^{\wedge}\text{C}_2 + \text{P(OPh)}_3)$                |
| L+3 | -0.66  | 14              | 31                            | 51                  | 4      | $d(\text{Ir}) + \pi^*(\text{P}^{\wedge}\text{C}_2 + \text{P(OPh)}_3)$ |
| L+2 | -0.72  | 13              | 28                            | 53                  | 5      | $\pi^*(\text{P}^{\wedge}\text{C}_2 + \text{P(OPh)}_3)$                |
| L+1 | -1.81  | 0               | 1                             | 1                   | 99     | $\pi^*(\text{N}^{\wedge}\text{N})$                                    |
| L   | -2.08  | 2               | 1                             | 1                   | 96     | $\pi^*(\text{N}^{\wedge}\text{N})$                                    |
| H   | -6.52  | 21              | 75                            | 2                   | 2      | $d(\text{Ir}) + \pi(\text{P}^{\wedge}\text{C}_2)$                     |
| H-1 | -6.63  | 3               | 96                            | 1                   | 1      | $\pi(\text{P}^{\wedge}\text{C}_2)$                                    |
| H-2 | -7.03  | 1               | 88                            | 6                   | 4      | $\pi(\text{P}^{\wedge}\text{C}_2)$                                    |
| H-3 | -7.11  | 2               | 95                            | 1                   | 2      | $\pi(\text{P}^{\wedge}\text{C}_2)$                                    |
| H-4 | -7.23  | 0               | 1                             | 99                  | 1      | $\pi(\text{P(OPh)}_3)$                                                |
| H-5 | -7.26  | 1               | 5                             | 91                  | 4      | $\pi(\text{P(OPh)}_3)$                                                |
| H-6 | -7.34  | 11              | 11                            | 11                  | 67     | $\pi(\text{N}^{\wedge}\text{N})$                                      |
| H-7 | -7.52  | 0               | 99                            | 0                   | 1      | $\pi(\text{P}^{\wedge}\text{C}_2)$                                    |
| H-8 | -7.59  | 0               | 1                             | 98                  | 1      | $\pi(\text{P(OPh)}_3)$                                                |

**Table S6** Frontier molecular orbital energies (eV) and compositions (%) in the ground state for complex **2**

| MO  | Energy | Contribution(%) |                               |                     |                  | Assign                             |
|-----|--------|-----------------|-------------------------------|---------------------|------------------|------------------------------------|
|     |        | Ir              | P <sup>^</sup> C <sub>2</sub> | P(OPh) <sub>3</sub> | N <sup>^</sup> N |                                    |
| L+8 | -0.37  | 4               | 51                            | 44                  | 2                | $\pi^*(P^{\wedge}C_2 + P(OPh)_3)$  |
| L+7 | -0.39  | 2               | 27                            | 71                  | 0                | $\pi^*(P^{\wedge}C_2 + P(OPh)_3)$  |
| L+6 | -0.40  | 0               | 6                             | 93                  | 1                | $\pi^*(P(OPh)_3)$                  |
| L+5 | -0.50  | 7               | 53                            | 37                  | 3                | $\pi^*(P^{\wedge}C_2 + P(OPh)_3)$  |
| L+4 | -0.52  | 6               | 76                            | 16                  | 2                | $\pi^*(P^{\wedge}C_2 + P(OPh)_3)$  |
| L+3 | -0.56  | 7               | 24                            | 66                  | 3                | $\pi^*(P^{\wedge}C_2 + P(OPh)_3)$  |
| L+2 | -0.66  | 3               | 10                            | 85                  | 2                | $\pi^*(P(OPh)_3)$                  |
| L+1 | -1.08  | 0               | 1                             | 1                   | 97               | $\pi^*(N^{\wedge}N)$               |
| L   | -1.69  | 2               | 2                             | 1                   | 95               | $\pi^*(N^{\wedge}N)$               |
| H   | -6.36  | 20              | 69                            | 4                   | 7                | $d(Ir) + \pi(P^{\wedge}C_2)$       |
| H-1 | -6.52  | 6               | 79                            | 1                   | 14               | $\pi(P^{\wedge}C_2)$               |
| H-2 | -6.56  | 5               | 40                            | 0                   | 55               | $\pi(P^{\wedge}C_2 + N^{\wedge}N)$ |
| H-3 | -6.96  | 1               | 93                            | 4                   | 2                | $\pi(P^{\wedge}C_2)$               |
| H-4 | -7.01  | 2               | 95                            | 1                   | 2                | $\pi(P^{\wedge}C_2)$               |
| H-5 | -7.18  | 0               | 1                             | 99                  | 0                | $\pi(P(OPh)_3)$                    |
| H-6 | -7.20  | 0               | 1                             | 98                  | 1                | $\pi(P(OPh)_3)$                    |
| H-7 | -7.40  | 11              | 24                            | 13                  | 53               | $\pi(P^{\wedge}C_2 + N^{\wedge}N)$ |
| H-8 | -7.47  | 1               | 93                            | 2                   | 4                | $\pi(P^{\wedge}C_2)$               |

**Table S7** Frontier molecular orbital energies (eV) and compositions (%) in the ground state for complex **2a**

| MO  | Energy | Contribution(%) |                               |                     |                  | Assign                                        |
|-----|--------|-----------------|-------------------------------|---------------------|------------------|-----------------------------------------------|
|     |        | Ir              | P <sup>^</sup> C <sub>2</sub> | P(OPh) <sub>3</sub> | N <sup>^</sup> N |                                               |
| L+8 | -0.32  | 5               | 69                            | 25                  | 1                | $\pi^*(P^{\wedge}C_2 + P(OPh)_3)$             |
| L+7 | -0.38  | 0               | 5                             | 94                  | 0                | $\pi^*(P(OPh)_3)$                             |
| L+6 | -0.39  | 0               | 3                             | 97                  | 0                | $\pi^*(P(OPh)_3)$                             |
| L+5 | -0.46  | 9               | 57                            | 31                  | 3                | $\pi^*(P^{\wedge}C_2 + P(OPh)_3)$             |
| L+4 | -0.48  | 4               | 87                            | 7                   | 1                | $\pi^*(P^{\wedge}C_2)$                        |
| L+3 | -0.55  | 3               | 12                            | 84                  | 1                | $\pi^*(P(OPh)_3)$                             |
| L+2 | -0.65  | 3               | 8                             | 87                  | 1                | $\pi^*(P(OPh)_3)$                             |
| L+1 | -1.65  | 0               | 0                             | 0                   | 99               | $\pi^*(N^{\wedge}N)$                          |
| L   | -2.11  | 2               | 1                             | 1                   | 95               | $\pi^*(N^{\wedge}N)$                          |
| H   | -6.38  | 20              | 68                            | 2                   | 10               | $d(Ir)+\pi(P^{\wedge}C_2)$                    |
| H-1 | -6.52  | 5               | 94                            | 1                   | 1                | $\pi(P^{\wedge}C_2)$                          |
| H-2 | -6.71  | 7               | 19                            | 2                   | 72               | $\pi(P^{\wedge}C_2 + N^{\wedge}N)$            |
| H-3 | -6.96  | 1               | 90                            | 3                   | 6                | $\pi(P^{\wedge}C_2)$                          |
| H-4 | -7.02  | 3               | 93                            | 1                   | 3                | $\pi(P^{\wedge}C_2)$                          |
| H-5 | -7.18  | 0               | 1                             | 99                  | 0                | $\pi(P(OPh)_3)$                               |
| H-6 | -7.20  | 0               | 1                             | 99                  | 0                | $\pi(P(OPh)_3)$                               |
| H-7 | -7.41  | 0               | 98                            | 0                   | 1                | $\pi(P^{\wedge}C_2)$                          |
| H-8 | -7.50  | 9               | 22                            | 29                  | 40               | $\pi(P^{\wedge}C_2 + P(OPh)_3 + N^{\wedge}N)$ |



**Table S8** Frontier molecular orbital energies (eV) and compositions (%) in the ground state for complex **2b**

| MO  | Energy | Contribution(%) |                               |                     | Assign |                                                         |
|-----|--------|-----------------|-------------------------------|---------------------|--------|---------------------------------------------------------|
|     |        | Ir              | P <sup>^</sup> C <sub>2</sub> | P(OPh) <sub>3</sub> |        | N <sup>^</sup> N                                        |
| L+8 | -0.39  | 2               | 20                            | 77                  | 1      | $\pi^*(P^{\wedge}C_2 + P(OPh)_3)$                       |
| L+7 | -0.48  | 1               | 91                            | 8                   | 0      | $\pi^*(P^{\wedge}C_2)$                                  |
| L+6 | -0.56  | 3               | 1                             | 96                  | 0      | $\pi^*(P(OPh)_3)$                                       |
| L+5 | -0.57  | 2               | 2                             | 96                  | 0      | $\pi^*(P(OPh)_3)$                                       |
| L+4 | -0.66  | 5               | 47                            | 48                  | 0      | $\pi^*(P^{\wedge}C_2 + P(OPh)_3)$                       |
| L+3 | -1.02  | 17              | 29                            | 49                  | 6      | $d(Ir) + \pi^*(P^{\wedge}C_2 + P(OPh)_3)$               |
| L+2 | -1.34  | 21              | 39                            | 29                  | 11     | $d(Ir) + \pi^*(P^{\wedge}C_2 + P(OPh)_3 + N^{\wedge}N)$ |
| L+1 | -1.62  | 1               | 1                             | 1                   | 97     | $\pi^*(N^{\wedge}N)$                                    |
| L   | -2.43  | 2               | 2                             | 3                   | 93     | $\pi^*(N^{\wedge}N)$                                    |
| H   | -6.57  | 22              | 74                            | 1                   | 3      | $d(Ir) + \pi(P^{\wedge}C_2)$                            |
| H-1 | -6.73  | 2               | 97                            | 1                   | 1      | $\pi(P^{\wedge}C_2)$                                    |
| H-2 | -7.03  | 4               | 61                            | 6                   | 29     | $\pi(P^{\wedge}C_2 + N^{\wedge}N)$                      |
| H-3 | -7.15  | 6               | 49                            | 4                   | 42     | $\pi(P^{\wedge}C_2 + N^{\wedge}N)$                      |
| H-4 | -7.21  | 2               | 57                            | 38                  | 3      | $\pi(P^{\wedge}C_2 + P(OPh)_3)$                         |
| H-5 | -7.23  | 1               | 16                            | 82                  | 1      | $\pi(P(OPh)_3)$                                         |
| H-6 | -7.25  | 1               | 15                            | 75                  | 9      | $\pi(P(OPh)_3)$                                         |
| H-7 | -7.41  | 0               | 97                            | 1                   | 2      | $\pi(P^{\wedge}C_2)$                                    |
| H-8 | -7.64  | 0               | 1                             | 99                  | 0      | $\pi(P(OPh)_3)$                                         |

**Table S9** Frontier molecular orbital energies (eV) and compositions (%) in the ground state for complex **2c**

| MO  | Energy | Contribution(%) |                               |                     |                  | Assign                                        |
|-----|--------|-----------------|-------------------------------|---------------------|------------------|-----------------------------------------------|
|     |        | Ir              | P <sup>^</sup> C <sub>2</sub> | P(OPh) <sub>3</sub> | N <sup>^</sup> N |                                               |
| L+8 | -0.40  | 1               | 23                            | 76                  | 1                | $\pi^*(P^{\wedge}C_2 + P(OPh)_3)$             |
| L+7 | -0.41  | 2               | 53                            | 44                  | 1                | $\pi^*(P^{\wedge}C_2 + P(OPh)_3)$             |
| L+6 | -0.43  | 1               | 13                            | 85                  | 1                | $\pi^*(P(OPh)_3)$                             |
| L+5 | -0.53  | 2               | 76                            | 21                  | 1                | $\pi^*(P^{\wedge}C_2 + P(OPh)_3)$             |
| L+4 | -0.56  | 5               | 30                            | 63                  | 2                | $\pi^*(P^{\wedge}C_2 + P(OPh)_3)$             |
| L+3 | -0.61  | 15              | 38                            | 42                  | 5                | d(Ir)+ $\pi^*(P^{\wedge}C_2 + P(OPh)_3)$      |
| L+2 | -0.69  | 5               | 14                            | 78                  | 2                | $\pi^*(P(OPh)_3)$                             |
| L+1 | -1.39  | 0               | 1                             | 1                   | 98               | $\pi^*(N^{\wedge}N)$                          |
| L   | -2.23  | 2               | 1                             | 1                   | 95               | $\pi^*(N^{\wedge}N)$                          |
| H   | -6.45  | 19              | 63                            | 2                   | 16               | d(Ir)+ $\pi(P^{\wedge}C_2 + N^{\wedge}N)$     |
| H-1 | -6.58  | 4               | 94                            | 1                   | 2                | $\pi(P^{\wedge}C_2)$                          |
| H-2 | -6.68  | 6               | 21                            | 1                   | 72               | $\pi(P^{\wedge}C_2 + N^{\wedge}N)$            |
| H-3 | -7.01  | 1               | 92                            | 5                   | 3                | $\pi(P^{\wedge}C_2)$                          |
| H-4 | -7.07  | 2               | 95                            | 1                   | 2                | $\pi(P^{\wedge}C_2)$                          |
| H-5 | -7.21  | 0               | 1                             | 99                  | 0                | $\pi(P(OPh)_3)$                               |
| H-6 | -7.24  | 0               | 2                             | 98                  | 0                | $\pi(P(OPh)_3)$                               |
| H-7 | -7.48  | 1               | 93                            | 1                   | 5                | $\pi(P^{\wedge}C_2)$                          |
| H-8 | -7.54  | 9               | 22                            | 28                  | 42               | $\pi(P^{\wedge}C_2 + P(OPh)_3 + N^{\wedge}N)$ |

**Table S10** Frontier molecular orbital energies (eV) and compositions (%) in the ground state for complex **2d**

| MO  | Energy | Contribution(%) |                               |                     | Assign |                                                                                  |
|-----|--------|-----------------|-------------------------------|---------------------|--------|----------------------------------------------------------------------------------|
|     |        | Ir              | P <sup>^</sup> C <sub>2</sub> | P(OPh) <sub>3</sub> |        | N <sup>^</sup> N                                                                 |
| L+8 | -0.39  | 1               | 12                            | 86                  | 1      | $\pi^*(\text{P(OPh)}_3)$                                                         |
| L+7 | -0.41  | 3               | 63                            | 34                  | 1      | $\pi^*(\text{P}^{\wedge}\text{C}_2 + \text{P(OPh)}_3)$                           |
| L+6 | -0.42  | 1               | 12                            | 87                  | 1      | $\pi^*(\text{P(OPh)}_3)$                                                         |
| L+5 | -0.52  | 3               | 70                            | 27                  | 1      | $\pi^*(\text{P}^{\wedge}\text{C}_2 + \text{P(OPh)}_3)$                           |
| L+4 | -0.55  | 5               | 39                            | 53                  | 2      | $\pi^*(\text{P}^{\wedge}\text{C}_2 + \text{P(OPh)}_3)$                           |
| L+3 | -0.59  | 14              | 38                            | 43                  | 5      | $d(\text{Ir}) + \pi^*(\text{P}^{\wedge}\text{C}_2 + \text{P(OPh)}_3)$            |
| L+2 | -0.68  | 4               | 13                            | 81                  | 2      | $\pi^*(\text{P(OPh)}_3)$                                                         |
| L+1 | -1.64  | 0               | 1                             | 1                   | 99     | $\pi^*(\text{N}^{\wedge}\text{N})$                                               |
| L   | -1.89  | 2               | 1                             | 1                   | 95     | $\pi^*(\text{N}^{\wedge}\text{N})$                                               |
| H   | -6.43  | 21              | 66                            | 2                   | 11     | $d(\text{Ir}) + \pi(\text{P}^{\wedge}\text{C}_2)$                                |
| H-1 | -6.56  | 3               | 95                            | 1                   | 2      | $\pi(\text{P}^{\wedge}\text{C}_2)$                                               |
| H-2 | -6.72  | 7               | 18                            | 1                   | 74     | $\pi(\text{N}^{\wedge}\text{N})$                                                 |
| H-3 | -7.00  | 1               | 91                            | 4                   | 4      | $\pi(\text{P}^{\wedge}\text{C}_2)$                                               |
| H-4 | -7.05  | 3               | 94                            | 1                   | 3      | $\pi(\text{P}^{\wedge}\text{C}_2)$                                               |
| H-5 | -7.20  | 0               | 1                             | 99                  | 0      | $\pi(\text{P(OPh)}_3)$                                                           |
| H-6 | -7.23  | 0               | 1                             | 98                  | 0      | $\pi(\text{P(OPh)}_3)$                                                           |
| H-7 | -7.48  | 1               | 91                            | 2                   | 6      | $\pi(\text{P}^{\wedge}\text{C}_2)$                                               |
| H-8 | -7.53  | 8               | 25                            | 28                  | 39     | $\pi(\text{P}^{\wedge}\text{C}_2 + \text{P(OPh)}_3 + \text{N}^{\wedge}\text{N})$ |

**Table S11** Selected calculated wavelength (nm)/energies (eV), oscillator strength ( $f$ ), major contribution and transition characters for **1-1d** in CH<sub>2</sub>Cl<sub>2</sub> media, along with the experimental data for **1**

|           | state           | $\lambda/E$ | $f$   | Configuration | Assignment                                                                                                         | Exptl. <sup>a</sup> |
|-----------|-----------------|-------------|-------|---------------|--------------------------------------------------------------------------------------------------------------------|---------------------|
| <b>1</b>  | S <sub>1</sub>  | 326/3.79    | 0.022 | H→L(85%)      | [d(Ir)+π(P <sup>^</sup> C <sub>2</sub> )→π*( N <sup>^</sup> N)] MLCT/LLCT                                          | 310                 |
|           | S <sub>3</sub>  | 288/4.30    | 0.125 | H-2→L(55%)    | [d(Ir)+π(P <sup>^</sup> C <sub>2</sub> + N <sup>^</sup> N)→π*( N <sup>^</sup> N)] MLCT/LLCT/ILCT                   |                     |
|           | S <sub>6</sub>  | 271/4.57    | 0.057 | H-4→L (46%)   | [π(P <sup>^</sup> C <sub>2</sub> + N <sup>^</sup> N)→π*( N <sup>^</sup> N)] LLCT/ILCT                              |                     |
|           | S <sub>11</sub> | 251/4.94    | 0.081 | H-7→L (59%)   | [π(P <sup>^</sup> C <sub>2</sub> )→π*( N <sup>^</sup> N)] LLCT/ILCT                                                |                     |
|           | S <sub>13</sub> | 247/5.01    | 0.073 | H-2→L+1(53%)  | [π(P <sup>^</sup> C <sub>2</sub> + N <sup>^</sup> N)→π*( N <sup>^</sup> N)] MLCT/LLCT/ILCT                         |                     |
| <b>1a</b> | S <sub>1</sub>  | 363/3.41    | 0.038 | H→L(70%)      | [d(Ir)+π(P <sup>^</sup> C <sub>2</sub> )→π*( N <sup>^</sup> N)] MLCT/LLCT/ILCT                                     |                     |
|           | S <sub>7</sub>  | 293/4.21    | 0.059 | H-6→L(58%)    | [π(N <sup>^</sup> N)→π*( N <sup>^</sup> N)] ILCT                                                                   |                     |
|           | S <sub>15</sub> | 263/4.70    | 0.085 | H-6→L+1(61%)  | [π(N <sup>^</sup> N)→π*( N <sup>^</sup> N)] ILCT                                                                   |                     |
|           | S <sub>31</sub> | 239/5.17    | 0.110 | H-8→L+2(54%)  | [π(P(OPh) <sub>3</sub> )→π*( P <sup>^</sup> C <sub>2</sub> + P(OPh) <sub>3</sub> )] LLCT/ILCT                      |                     |
| <b>1b</b> | S <sub>1</sub>  | 359/3.44    | 0.017 | H→L(80%)      | [d(Ir)+π(P <sup>^</sup> C <sub>2</sub> )→π*( N <sup>^</sup> N)] MLCT/LLCT                                          |                     |
|           | S <sub>4</sub>  | 302/4.10    | 0.047 | H-2→L (64%)   | [π(P <sup>^</sup> C <sub>2</sub> )→π*( N <sup>^</sup> N)] LLCT                                                     |                     |
|           | S <sub>6</sub>  | 286/4.30    | 0.122 | H-6→L (46%)   | [π(N <sup>^</sup> N)→π*( N <sup>^</sup> N)] ILCT                                                                   |                     |
|           | S <sub>15</sub> | 260/4.76    | 0.054 | H-3→L+4 (57%) | [π(P <sup>^</sup> C <sub>2</sub> )→π*( P(OPh) <sub>3</sub> )] LLCT                                                 |                     |
| <b>1c</b> | S <sub>1</sub>  | 369/3.35    | 0.025 | H→L(74%)      | [d(Ir)+π(P <sup>^</sup> C <sub>2</sub> )→π*( N <sup>^</sup> N)] MLCT/LLCT                                          |                     |
|           | S <sub>3</sub>  | 315/3.93    | 0.081 | H-2→L (48%)   | [π(P <sup>^</sup> C <sub>2</sub> )→π*( N <sup>^</sup> N)] LLCT                                                     |                     |
|           | S <sub>11</sub> | 272/4.54    | 0.090 | H-8→L+2 (51%) | [π(P(OPh) <sub>3</sub> )→d(Ir)+π*(P <sup>^</sup> C <sub>2</sub> + P(OPh) <sub>3</sub> )] MLCT/LLCT/ILCT            |                     |
|           | S <sub>26</sub> | 246/5.03    | 0.057 | H-5→L+5 (63%) | [π(P(OPh) <sub>3</sub> + N <sup>^</sup> N)→π*( P <sup>^</sup> C <sub>2</sub> )] MLCT/LLCT                          |                     |
| <b>1d</b> | S <sub>1</sub>  | 340/3.64    | 0.021 | H→L(81%)      | [d(Ir)+π(P <sup>^</sup> C <sub>2</sub> )→π*( N <sup>^</sup> N)] MLCT/LLCT                                          |                     |
|           | S <sub>6</sub>  | 289/4.28    | 0.061 | H-2→L (53%)   | [π(P <sup>^</sup> C <sub>2</sub> )→π*( N <sup>^</sup> N)] LLCT                                                     |                     |
|           | S <sub>10</sub> | 269/4.59    | 0.062 | H-2→L+1 (58%) | [π(P <sup>^</sup> C <sub>2</sub> )→π*( N <sup>^</sup> N)] LLCT                                                     |                     |
|           | S <sub>38</sub> | 230/5.37    | 0.107 | H-2→L+3 (43%) | [π(P <sup>^</sup> C <sub>2</sub> )→d(Ir)+π*( P <sup>^</sup> C <sub>2</sub> + P(OPh) <sub>3</sub> )] MLCT/LLCT/ILCT |                     |

<sup>a</sup> Ref. 11.

**Table S12** Selected calculated wavelength (nm)/energies (eV), oscillator strength ( $f$ ), major contribution and transition characters for **2-2d** in CH<sub>2</sub>Cl<sub>2</sub> media, along with the experimental data for **2**

|           | state           | $\lambda/E$ | $f$   | Configuration | Assignment                                                                                                    | Exptl. <sup>a</sup> |
|-----------|-----------------|-------------|-------|---------------|---------------------------------------------------------------------------------------------------------------|---------------------|
| <b>2</b>  | S <sub>1</sub>  | 322/3.84    | 0.034 | H→L(91%)      | [d(Ir)+ $\pi(P^{\wedge}C_2)$ → $\pi^*(N^{\wedge}N)$ ] MLCT/LLCT                                               | 322                 |
|           | S <sub>2</sub>  | 307/4.02    | 0.099 | H-1→L (74%)   | [ $\pi(P^{\wedge}C_2)$ → $\pi^*(N^{\wedge}N)$ ] LLCT                                                          |                     |
|           | S <sub>4</sub>  | 273/4.52    | 0.109 | H→L+1(83%)    | [d(Ir)+ $\pi(P^{\wedge}C_2 + N^{\wedge}N)$ → $\pi^*(N^{\wedge}N)$ ] MLCT/LLCT/ILCT                            |                     |
|           | S <sub>10</sub> | 255/4.85    | 0.051 | H-7→L (45%)   | [ $\pi(P^{\wedge}C_2 + N^{\wedge}N)$ → $\pi^*(N^{\wedge}N)$ ] LLCT/ILCT                                       |                     |
| <b>2a</b> | S <sub>1</sub>  | 358/3.45    | 0.029 | H→L(82%)      | [d(Ir)+ $\pi(P^{\wedge}C_2)$ → $\pi^*(N^{\wedge}N)$ ] MLCT/LLCT                                               |                     |
|           | S <sub>8</sub>  | 287/4.30    | 0.103 | H-2→L+1(73%)  | [ $\pi(P^{\wedge}C_2 + N^{\wedge}N)$ → $\pi^*(N^{\wedge}N)$ ] LLCT/ILCT                                       |                     |
|           | S <sub>12</sub> | 271/4.56    | 0.065 | H-8→L (48%)   | [ $\pi(P^{\wedge}C_2 + P(OPh)_3 + N^{\wedge}N)$ → $\pi^*(N^{\wedge}N)$ ] LLCT/ILCT                            |                     |
|           | S <sub>29</sub> | 242/5.10    | 0.147 | H-1→L+4(60%)  | [ $\pi(P^{\wedge}C_2)$ → $\pi^*(P^{\wedge}C_2)$ ] ILCT                                                        |                     |
| <b>2b</b> | S <sub>1</sub>  | 371/3.33    | 0.018 | H→L(89%)      | [d(Ir)+ $\pi(P^{\wedge}C_2)$ → $\pi^*(N^{\wedge}N)$ ] MLCT/LLCT                                               |                     |
|           | S <sub>3</sub>  | 321/3.85    | 0.113 | H-2→L (64%)   | [ $\pi(P^{\wedge}C_2 + N^{\wedge}N)$ → $\pi^*(N^{\wedge}N)$ ] LLCT/ILCT                                       |                     |
|           | S <sub>19</sub> | 264/4.69    | 0.055 | H-2→L+2(45%)  | [ $\pi(P^{\wedge}C_2 + N^{\wedge}N)$ →d(Ir)+ $\pi^*(P^{\wedge}C_2 + P(OPh)_3 + N^{\wedge}N)$ ] MLCT/LLCT/ILCT |                     |
|           | S <sub>39</sub> | 237/5.22    | 0.061 | H-7→L+2 (43%) | [ $\pi(P^{\wedge}C_2)$ →d(Ir)+ $\pi^*(P^{\wedge}C_2 + P(OPh)_3 + N^{\wedge}N)$ ] MLCT/LLCT/ILCT               |                     |
| <b>2c</b> | S <sub>1</sub>  | 365/3.39    | 0.026 | H→L(86%)      | [d(Ir)+ $\pi(P^{\wedge}C_2 + N^{\wedge}N)$ → $\pi^*(N^{\wedge}N)$ ] MLCT/LLCT/ILCT                            |                     |
|           | S <sub>3</sub>  | 333/3.71    | 0.080 | H-2→L (70%)   | [ $\pi(P^{\wedge}C_2 + N^{\wedge}N)$ → $\pi^*(N^{\wedge}N)$ ] LLCT/ILCT                                       |                     |
|           | S <sub>7</sub>  | 286/4.32    | 0.059 | H→L+1 (77%)   | [d(Ir)+ $\pi(P^{\wedge}C_2 + N^{\wedge}N)$ → $\pi^*(N^{\wedge}N)$ ] MLCT/LLCT/ILCT                            |                     |
|           | S <sub>9</sub>  | 279/4.43    | 0.049 | H-5→L (33%)   | [ $\pi(P(OPh)_3)$ → $\pi^*(N^{\wedge}N)$ ] LLCT                                                               |                     |
| <b>2d</b> | S <sub>1</sub>  | 334/3.71    | 0.020 | H→L(88%)      | [d(Ir)+ $\pi(P^{\wedge}C_2)$ → $\pi^*(N^{\wedge}N)$ ] MLCT/LLCT                                               |                     |
|           | S <sub>4</sub>  | 302/4.09    | 0.087 | H-2→L (44%)   | [ $\pi(N^{\wedge}N)$ → $\pi^*(N^{\wedge}N)$ ] ILCT                                                            |                     |
|           | S <sub>5</sub>  | 294/4.20    | 0.092 | H-1→L+1 (58%) | [ $\pi(P^{\wedge}C_2)$ → $\pi^*(N^{\wedge}N)$ ] LLCT                                                          |                     |
|           | S <sub>16</sub> | 257/4.81    | 0.117 | H-8→L (51%)   | [ $\pi(P^{\wedge}C_2 + P(OPh)_3 + N^{\wedge}N)$ → $\pi^*(N^{\wedge}N)$ ] LLCT/ILCT                            |                     |

<sup>a</sup> Ref. 11.

**Table S13** The plots of the hole and virtual natural transition orbitals (NTOs) correspond to electronic transitions from the ground state to the singlet excited states  $S_1$  for all the studied complexes

| Complexes | Hole                                                                                | Virtual                                                                             | Complexes | Hole                                                                                  | Virtual                                                                               |
|-----------|-------------------------------------------------------------------------------------|-------------------------------------------------------------------------------------|-----------|---------------------------------------------------------------------------------------|---------------------------------------------------------------------------------------|
| <b>1</b>  | 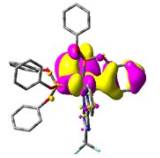   |    | <b>2</b>  |    |    |
| <b>1a</b> |    |    | <b>2a</b> |    |    |
| <b>1b</b> |   |   | <b>2b</b> |   |   |
| <b>1c</b> |  |  | <b>2c</b> |  |  |
| <b>1d</b> |  |  | <b>2d</b> |  |  |

**Table S14** Calculated phosphorescent emission wavelength ( $\lambda$ , in nm) for **1** and **2** in CH<sub>2</sub>Cl<sub>2</sub> media with the TDDFT method at M062X, M052X, BP86 and PBE0 level, respectively, together with the experimental values

|   | M062X | M052X | BP86 | PBE0 | Exptl. <sup>a</sup> |
|---|-------|-------|------|------|---------------------|
| 1 | 464   | 489   | 533  | 531  | 458                 |
| 2 | 493   | 509   | 537  | 551  | 492                 |

<sup>a</sup> Ref. 11.

**Table S15** Frontier molecular orbital energies (eV) and composition (%) of **1-6d** and **2-2d** in the lowest lying triplet excited state (L and H represent the LUMO and HOMO, respectively)

|           | MO  | <i>E</i> | MO composition(%) |                               |                     |                  | Assign                                  |
|-----------|-----|----------|-------------------|-------------------------------|---------------------|------------------|-----------------------------------------|
| <b>1</b>  |     |          | Ir                | P <sup>^</sup> C <sub>2</sub> | P(OPh) <sub>3</sub> | N <sup>^</sup> N |                                         |
|           | L   | -2.26    | 2                 | 1                             | 1                   | 96               | $\pi^*(N^{\wedge}N)$                    |
|           | H   | -6.41    | 22                | 62                            | 2                   | 15               | d(Ir)+ $\pi(P^{\wedge}C_2+N^{\wedge}N)$ |
|           | H-2 | -6.73    | 4                 | 18                            | 0                   | 77               | $\pi(N^{\wedge}N)$                      |
| <b>1a</b> |     |          | Ir                | P <sup>^</sup> C <sub>2</sub> | P(OPh) <sub>3</sub> | N <sup>^</sup> N |                                         |
|           | L   | -2.74    | 4                 | 2                             | 2                   | 92               | $\pi^*(N^{\wedge}N)$                    |
|           | H   | -6.03    | 26                | 48                            | 1                   | 25               | d(Ir)+ $\pi(P^{\wedge}C_2+N^{\wedge}N)$ |
| <b>1b</b> |     |          | Ir                | P <sup>^</sup> C <sub>2</sub> | P(OPh) <sub>3</sub> | N <sup>^</sup> N |                                         |
|           | L   | -2.70    | 2                 | 1                             | 1                   | 95               | $\pi^*(N^{\wedge}N)$                    |
|           | H   | -6.05    | 26                | 69                            | 2                   | 4                | d(Ir)+ $\pi(P^{\wedge}C_2)$             |
|           | H-1 | -6.54    | 19                | 9                             | 17                  | 54               | d(Ir)+ $\pi(P(OPh)_3+N^{\wedge}N)$      |
| <b>1c</b> |     |          | Ir                | P <sup>^</sup> C <sub>2</sub> | P(OPh) <sub>3</sub> | N <sup>^</sup> N |                                         |
|           | L   | -2.72    | 3                 | 1                             | 1                   | 95               | $\pi^*(N^{\wedge}N)$                    |
|           | H   | -6.49    | 21                | 69                            | 2                   | 9                | d(Ir)+ $\pi(P^{\wedge}C_2)$             |
|           | H-2 | -6.92    | 4                 | 24                            | 1                   | 71               | $\pi(P^{\wedge}C_2+N^{\wedge}N)$        |
| <b>1d</b> |     |          | Ir                | P <sup>^</sup> C <sub>2</sub> | P(OPh) <sub>3</sub> | N <sup>^</sup> N |                                         |

|           |     |       |    |                 |            |               |                                        |
|-----------|-----|-------|----|-----------------|------------|---------------|----------------------------------------|
| <b>2</b>  | L   | -2.52 | 2  | 1               | 1          | 95            | $\pi^*(N^{\wedge}N)$                   |
|           | H   | -6.40 | 24 | 49              | 1          | 26            | $d(Ir)+\pi(P^{\wedge}C_2+N^{\wedge}N)$ |
|           |     |       | Ir | $P^{\wedge}C_2$ | $P(OPh)_3$ | $N^{\wedge}N$ |                                        |
| <b>2a</b> | L   | -1.97 | 2  | 1               | 1          | 95            | $\pi^*(N^{\wedge}N)$                   |
|           | H   | -6.11 | 8  | 10              | 1          | 81            | $\pi(N^{\wedge}N)$                     |
|           |     |       | Ir | $P^{\wedge}C_2$ | $P(OPh)_3$ | $N^{\wedge}N$ |                                        |
| <b>2b</b> | L   | -2.30 | 3  | 2               | 1          | 94            | $\pi^*(N^{\wedge}N)$                   |
|           | H   | -6.23 | 18 | 37              | 2          | 43            | $d(Ir)+\pi(P^{\wedge}C_2+N^{\wedge}N)$ |
|           |     |       | Ir | $P^{\wedge}C_2$ | $P(OPh)_3$ | $N^{\wedge}N$ |                                        |
| <b>2c</b> | L   | -2.68 | 3  | 2               | 3          | 93            | $\pi^*(N^{\wedge}N)$                   |
|           | H   | -6.50 | 23 | 63              | 2          | 12            | $d(Ir)+\pi(P^{\wedge}C_2)$             |
|           | H-1 | -6.72 | 4  | 96              | 0          | 0             | $\pi(P^{\wedge}C_2)$                   |
|           |     |       | Ir | $P^{\wedge}C_2$ | $P(OPh)_3$ | $N^{\wedge}N$ |                                        |
| <b>2d</b> | L   | -2.47 | 3  | 1               | 1          | 95            | $\pi^*(N^{\wedge}N)$                   |
|           | H   | -6.26 | 11 | 18              | 1          | 70            | $d(Ir)+\pi(P^{\wedge}C_2+N^{\wedge}N)$ |
|           |     |       | Ir | $P^{\wedge}C_2$ | $P(OPh)_3$ | $N^{\wedge}N$ |                                        |
|           | L   | -2.15 | 2  | 1               | 1          | 95            | $\pi^*(N^{\wedge}N)$                   |
|           | H   | -6.28 | 15 | 28              | 2          | 55            | $d(Ir)+\pi(P^{\wedge}C_2+N^{\wedge}N)$ |



**Table S16** The xyz coordinates for the optimized structures for **1** in the  $S_0$  and  $T_1$  states at PBE0/6-31G\* level

|    | $S_0$       |             |             | $T_1$       |             |             |
|----|-------------|-------------|-------------|-------------|-------------|-------------|
| Ir | -0.19286700 | -1.13309500 | -0.03083700 | 0.22391100  | -1.14477900 | 0.02720800  |
| P  | 1.95853000  | -1.55987500 | -0.18215900 | -1.92172500 | -1.60963700 | 0.17733300  |
| P  | -0.03981300 | 1.17030400  | 0.08384300  | 0.01408000  | 1.16946500  | -0.08881700 |
| O  | 2.45154000  | -1.24948600 | -1.68877700 | -2.41635900 | -1.31644200 | 1.68648400  |
| O  | 2.18358700  | -3.15201400 | 0.02163300  | -2.11904600 | -3.20333700 | -0.03648100 |
| O  | 3.09654000  | -0.92172500 | 0.73561800  | -3.07171700 | -0.98377900 | -0.73340300 |
| O  | 0.08453200  | 1.77226300  | 1.58523000  | -0.15817100 | 1.77133000  | -1.58378100 |
| O  | -1.28351300 | 1.96553700  | -0.57495600 | 1.25484300  | 1.99092800  | 0.54376600  |
| O  | 1.26986700  | 1.74927900  | -0.67285200 | -1.29300900 | 1.71107700  | 0.69877400  |
| N  | -0.61572800 | -1.34469000 | 2.08723700  | 0.62764000  | -1.30381500 | -2.07130800 |
| N  | -2.27529300 | -1.07293600 | 0.06165200  | 2.29185200  | -1.03388700 | -0.04455400 |
| N  | -3.26551000 | -0.92873200 | -0.81300100 | 3.26830300  | -0.88754700 | 0.81844400  |
| N  | -4.14600100 | -1.18187400 | 1.25224500  | 4.21087900  | -1.06360900 | -1.24739200 |
| C  | 0.29221400  | -1.44910900 | 3.06268400  | -0.22908500 | -1.39514300 | -3.06216100 |
| H  | 1.33091300  | -1.39291400 | 2.76126300  | -1.28069100 | -1.38237000 | -2.79485500 |
| C  | -0.06176000 | -1.60933600 | 4.39110400  | 0.14346100  | -1.50074300 | -4.41212800 |
| H  | 0.71286500  | -1.68935500 | 5.14396700  | -0.63109700 | -1.57675500 | -5.16441900 |
| C  | -1.40992400 | -1.66214000 | 4.72625100  | 1.53269200  | -1.51227600 | -4.76592400 |
| H  | -1.71792300 | -1.78875600 | 5.75825600  | 1.83216000  | -1.60003400 | -5.80353700 |
| C  | -2.35653800 | -1.54489500 | 3.72251800  | 2.44958200  | -1.40886500 | -3.77603800 |
| H  | -3.42000000 | -1.57134700 | 3.92690300  | 3.51621900  | -1.40519000 | -3.97035100 |
| C  | -1.92578900 | -1.38438500 | 2.41183000  | 2.01840900  | -1.29193100 | -2.40533200 |
| C  | -2.81654600 | -1.22483600 | 1.28176700  | 2.85277700  | -1.14442600 | -1.32358600 |
| C  | -4.35891000 | -1.00026200 | -0.05942800 | 4.38511400  | -0.91231200 | 0.05178300  |
| C  | -5.73027300 | -0.87019200 | -0.62914600 | 5.74619800  | -0.76174800 | 0.65809800  |
| C  | 1.38546800  | -1.05285500 | -2.57874500 | -1.35542800 | -1.10329300 | 2.57770800  |
| C  | 0.08177100  | -0.97715600 | -2.07260300 | -0.05156500 | -1.00363800 | 2.07284700  |
| C  | -0.92579200 | -0.77702800 | -3.01830800 | 0.94867900  | -0.78875100 | 3.02502300  |
| H  | -1.95460200 | -0.71316600 | -2.67915900 | 1.97775100  | -0.70532700 | 2.69239800  |
| C  | -0.63897000 | -0.65630100 | -4.37763500 | 0.65619100  | -0.67672300 | 4.38365600  |
| H  | -1.44949200 | -0.50031300 | -5.08354000 | 1.46185500  | -0.50886200 | 5.09236400  |
| C  | 0.67269800  | -0.73624400 | -4.83147300 | -0.65519400 | -0.78015000 | 4.83334000  |
| H  | 0.89884000  | -0.64334100 | -5.88899000 | -0.88620300 | -0.69399100 | 5.89035600  |
| C  | 1.70348200  | -0.93963200 | -3.92081200 | -1.67947100 | -0.99883000 | 3.91869200  |
| H  | 2.73861700  | -1.01082200 | -4.23772500 | -2.71414500 | -1.08860900 | 4.23228400  |
| C  | 0.99992200  | -3.89268500 | -0.11869500 | -0.92145000 | -3.92379400 | 0.08705200  |
| C  | -0.22122600 | -3.21323200 | -0.19156700 | 0.28824000  | -3.22390700 | 0.16054800  |
| C  | -1.35116600 | -4.01749800 | -0.35080600 | 1.43263200  | -4.01115100 | 0.29974700  |
| H  | -2.32723600 | -3.55251400 | -0.44247200 | 2.40171500  | -3.53168600 | 0.38973800  |
| C  | -1.26309200 | -5.40746300 | -0.40645900 | 1.36951000  | -5.40291800 | 0.33718600  |
| H  | -2.16549700 | -5.99919100 | -0.52838300 | 2.28322500  | -5.98009600 | 0.44329100  |
| C  | -0.02689400 | -6.03506800 | -0.31221800 | 0.14371200  | -6.05061800 | 0.24486600  |
| H  | 0.04764000  | -7.11706800 | -0.35577800 | 0.08801600  | -7.13416500 | 0.27508200  |
| C  | 1.12584800  | -5.26982300 | -0.17230600 | -1.02285400 | -5.30338300 | 0.12389800  |
| H  | 2.10780200  | -5.72712800 | -0.11006700 | -1.99732700 | -5.77655400 | 0.06290800  |
| C  | 4.47653400  | -1.08368200 | 0.54972200  | -4.44876500 | -1.16947500 | -0.54698400 |
| C  | 5.10703800  | -2.20734300 | 1.05939200  | -5.06189000 | -2.29783000 | -1.06727300 |
| H  | 4.52605200  | -2.97688000 | 1.55435600  | -4.46942200 | -3.05288300 | -1.57085600 |
| C  | 6.48590700  | -2.31794000 | 0.91608800  | -6.43868300 | -2.43156900 | -0.92381200 |
| H  | 6.99382500  | -3.19259500 | 1.30887900  | -6.93317200 | -3.31009700 | -1.32499200 |
| C  | 7.20953300  | -1.31633300 | 0.27775100  | -7.17736200 | -1.44782300 | -0.27501700 |
| H  | 8.28521600  | -1.40848900 | 0.17029600  | -8.25137700 | -1.55787500 | -0.16773500 |
| C  | 6.55367600  | -0.19580800 | -0.22173400 | -6.53878900 | -0.32204200 | 0.23491900  |

|   |             |             |             |             |             |             |
|---|-------------|-------------|-------------|-------------|-------------|-------------|
| H | 7.11411400  | 0.58851300  | -0.71977100 | -7.11104200 | 0.44849900  | 0.74096600  |
| C | 5.17541600  | -0.07170100 | -0.08826900 | -5.16277800 | -0.17489600 | 0.10154500  |
| H | 4.64354600  | 0.79271800  | -0.46981100 | -4.64424600 | 0.69406600  | 0.49103500  |
| C | 0.94321800  | 2.76051100  | 2.05253600  | -1.05264900 | 2.73773600  | -2.03036100 |
| C | 2.27861200  | 2.44835600  | 2.27125900  | -2.37994100 | 2.38544900  | -2.23633200 |
| H | 2.64637500  | 1.45508400  | 2.03620900  | -2.71170900 | 1.37768900  | -2.01002500 |
| C | 3.12342500  | 3.42594300  | 2.78428800  | -3.26244500 | 3.34149800  | -2.72582300 |
| H | 4.16951600  | 3.19127800  | 2.95281300  | -4.30241700 | 3.07496700  | -2.88446900 |
| C | 2.63296500  | 4.69373000  | 3.08156400  | -2.81719700 | 4.62831800  | -3.01227500 |
| H | 3.29591600  | 5.45330100  | 3.48259500  | -3.50942200 | 5.37113800  | -3.39477500 |
| C | 1.28889200  | 4.98217200  | 2.86896700  | -1.48041000 | 4.95713800  | -2.81304200 |
| H | 0.89819100  | 5.96679100  | 3.10464100  | -1.12443200 | 5.95666500  | -3.04084300 |
| C | 0.43315300  | 4.01520700  | 2.35174600  | -0.58707900 | 4.01188800  | -2.31978000 |
| H | -0.61658100 | 4.22574900  | 2.17876200  | 0.45759400  | 4.25438100  | -2.15885200 |
| C | -1.93888500 | 3.10241400  | -0.11527500 | 1.86305300  | 3.15419200  | 0.08368500  |
| C | -2.88463900 | 2.97275800  | 0.89270000  | 2.75646300  | 3.07535900  | -0.97602000 |
| H | -3.08014700 | 1.99916300  | 1.32920900  | 2.94415700  | 2.12159500  | -1.45691000 |
| C | -3.57192600 | 4.10218200  | 1.32210700  | 3.39950100  | 4.23131100  | -1.40353700 |
| H | -4.31105400 | 4.00836300  | 2.11102200  | 4.09712500  | 4.17707100  | -2.23290800 |
| C | -3.31960100 | 5.34121800  | 0.74163700  | 3.15540300  | 5.44613900  | -0.77091900 |
| H | -3.85936600 | 6.21999300  | 1.07880800  | 3.66069800  | 6.34564000  | -1.10679400 |
| C | -2.38106700 | 5.44749400  | -0.27937800 | 2.26860900  | 5.50171500  | 0.29925000  |
| H | -2.18639000 | 6.40873700  | -0.74393200 | 2.08013100  | 6.44402800  | 0.80342800  |
| C | -1.68338600 | 4.32646100  | -0.71599100 | 1.61544700  | 4.35382700  | 0.73493100  |
| H | -0.95069900 | 4.39555200  | -1.51203700 | 0.92318100  | 4.38309200  | 1.56878500  |
| C | 1.36333600  | 2.81935800  | -1.55574300 | -1.39603800 | 2.77737500  | 1.58543500  |
| C | 0.87664600  | 2.67859100  | -2.84781300 | -0.88946400 | 2.64196800  | 2.87035900  |
| H | 0.39789700  | 1.75155400  | -3.14622600 | -0.39030000 | 1.72277600  | 3.15950100  |
| C | 1.01501900  | 3.74029500  | -3.73461900 | -1.03569400 | 3.69830100  | 3.76237600  |
| H | 0.63364800  | 3.64155800  | -4.74580300 | -0.63919400 | 3.60382300  | 4.76813600  |
| C | 1.63838200  | 4.91782500  | -3.33262900 | -1.68641700 | 4.86500800  | 3.37233500  |
| H | 1.74352700  | 5.74281100  | -4.02959100 | -1.79763600 | 5.68593700  | 4.07313200  |
| C | 2.13159200  | 5.03222900  | -2.03692300 | -2.19973200 | 4.97354200  | 2.08394800  |
| H | 2.62362700  | 5.94565800  | -1.71866600 | -2.71362400 | 5.87821000  | 1.77538000  |
| C | 1.99607000  | 3.98054800  | -1.13678900 | -2.05704100 | 3.92711600  | 1.17887300  |
| H | 2.36869500  | 4.05455000  | -0.12103000 | -2.44595500 | 3.99662400  | 0.16894100  |
| F | -6.38151900 | 0.18499500  | -0.11038700 | 6.37099600  | 0.32164700  | 0.17509300  |
| F | -6.48247700 | -1.95091600 | -0.36221500 | 6.52100800  | -1.81864600 | 0.37734600  |
| F | -5.70457200 | -0.71462400 | -1.95442000 | 5.68694600  | -0.64024600 | 1.98401800  |

**Table S17** The xyz coordinates for the optimized structures for **2** in the  $S_0$  and  $T_1$  states at PBE0/6-31G\* level

|    | $S_0$       |             |             | $T_1$       |             |             |
|----|-------------|-------------|-------------|-------------|-------------|-------------|
| Ir | 0.18083800  | -1.12472000 | 0.02024900  | 0.22362100  | -1.13608700 | 0.02489300  |
| P  | -1.96883000 | -1.56313500 | 0.17180100  | -1.92006300 | -1.61230700 | 0.17287200  |
| P  | 0.02684700  | 1.17587400  | -0.07135800 | 0.00447600  | 1.17252200  | -0.08777800 |
| O  | -2.46173500 | -1.26871800 | 1.68357200  | -2.41796500 | -1.32898300 | 1.68431300  |
| O  | -2.18689900 | -3.15686800 | -0.04011600 | -2.11023200 | -3.20799600 | -0.04347600 |
| O  | -3.12000400 | -0.92834600 | -0.73466100 | -3.08144300 | -0.99377700 | -0.73133400 |
| O  | -0.08651300 | 1.79136000  | -1.56925600 | -0.16625200 | 1.78359700  | -1.58016700 |
| O  | 1.25899200  | 1.97641500  | 0.60548600  | 1.23865800  | 2.00345600  | 0.55095500  |
| O  | -1.28711400 | 1.75244200  | 0.68325800  | -1.30557800 | 1.71208200  | 0.69984700  |
| N  | 0.60234600  | -1.30445400 | -2.09812700 | 0.63161700  | -1.28832000 | -2.07601300 |
| N  | 2.26045400  | -1.06178400 | -0.06992700 | 2.28439700  | -1.02094000 | -0.04109200 |
| N  | 3.25753100  | -0.94899800 | 0.80992400  | 3.26212700  | -0.88761800 | 0.81775400  |
| N  | 4.13388900  | -1.16562000 | -1.25130900 | 4.20192000  | -1.05329700 | -1.25290600 |
| C  | -0.30453400 | -1.39356500 | -3.07652700 | -0.24064900 | -1.38284500 | -3.06592200 |
| H  | -1.34343500 | -1.34580900 | -2.77373700 | -1.28838000 | -1.37282500 | -2.78400400 |
| C  | 0.04958100  | -1.52829100 | -4.40701700 | 0.11774400  | -1.48403000 | -4.40863600 |
| H  | -0.72398600 | -1.59687100 | -5.16213500 | -0.66075300 | -1.56126300 | -5.15732000 |
| C  | 1.39970100  | -1.57074400 | -4.74059900 | 1.49965400  | -1.48633200 | -4.76739800 |
| H  | 1.70927200  | -1.67785900 | -5.77457000 | 1.79804700  | -1.56878900 | -5.80623300 |
| C  | 2.34425600  | -1.46872500 | -3.73475200 | 2.42548600  | -1.37944900 | -3.77732800 |
| H  | 3.40817800  | -1.48832500 | -3.93764900 | 3.49044000  | -1.36897300 | -3.98228300 |
| C  | 1.91488500  | -1.33255900 | -2.41863700 | 2.00760700  | -1.27096700 | -2.41483000 |
| C  | 2.80336700  | -1.19410100 | -1.28756500 | 2.85527300  | -1.12825500 | -1.33681100 |
| C  | 4.36938500  | -1.01371200 | 0.06938800  | 4.40603300  | -0.91033000 | 0.05327200  |
| C  | 5.76042400  | -0.91850600 | 0.64203900  | 5.77218500  | -0.77494700 | 0.65741400  |
| C  | -1.39444600 | -1.07367600 | 2.57224300  | -1.35863700 | -1.11113900 | 2.57674600  |
| C  | -0.09199800 | -0.98985000 | 2.06382900  | -0.05518600 | -1.00312700 | 2.07327600  |
| C  | 0.91750300  | -0.79307400 | 3.00800400  | 0.94192300  | -0.78412900 | 3.02747100  |
| H  | 1.94394100  | -0.72627900 | 2.66051800  | 1.97030500  | -0.69540400 | 2.69295800  |
| C  | 0.63377900  | -0.68158700 | 4.36883000  | 0.64751800  | -0.67515200 | 4.38631000  |
| H  | 1.44525200  | -0.52769400 | 5.07435600  | 1.45139900  | -0.50360100 | 5.09646200  |
| C  | -0.67673400 | -0.76832200 | 4.82542300  | -0.66370800 | -0.78632900 | 4.83452800  |
| H  | -0.90074500 | -0.68248800 | 5.88409400  | -0.89685500 | -0.70248500 | 5.89135900  |
| C  | -1.70927700 | -0.96977900 | 3.91607800  | -1.68511000 | -1.01001200 | 3.91780300  |
| H  | -2.74331900 | -1.04633900 | 4.23557500  | -2.71981000 | -1.10579000 | 4.22991000  |
| C  | -0.99821000 | -3.89126800 | 0.08887500  | -0.90887800 | -3.92176200 | 0.07739600  |
| C  | 0.21947000  | -3.20532800 | 0.16076900  | 0.29709900  | -3.21544900 | 0.15218300  |
| C  | 1.35524100  | -4.00359600 | 0.30866200  | 1.44537100  | -3.99766900 | 0.28825900  |
| H  | 2.32743400  | -3.52988000 | 0.39822300  | 2.41168000  | -3.51226900 | 0.37788900  |
| C  | 1.27554500  | -5.39450600 | 0.35497000  | 1.38970800  | -5.38999300 | 0.32225700  |
| H  | 2.18191300  | -5.98212800 | 0.46821900  | 2.30666100  | -5.96283500 | 0.42521200  |
| C  | 0.04258700  | -6.02902700 | 0.26215300  | 0.16734500  | -6.04410100 | 0.22925900  |
| H  | -0.02532800 | -7.11181700 | 0.29836800  | 0.11721000  | -7.12806700 | 0.25634600  |
| C  | -1.11545400 | -5.26974200 | 0.13314400  | -1.00289300 | -5.30223800 | 0.11085100  |
| H  | -2.09486400 | -5.73282800 | 0.07221600  | -1.97500700 | -5.78028500 | 0.04887400  |
| C  | -4.49653800 | -1.10429200 | -0.54418900 | -4.45456500 | -1.19603000 | -0.54169200 |
| C  | -5.11870300 | -2.23446900 | -1.05028100 | -5.05743100 | -2.32765000 | -1.06739400 |
| H  | -4.53213900 | -2.99932100 | -1.54588700 | -4.45809700 | -3.07270100 | -1.57769800 |
| C  | -6.49600600 | -2.35801400 | -0.90255500 | -6.43216400 | -2.47788700 | -0.92068900 |
| H  | -6.99674000 | -3.23803400 | -1.29267200 | -6.91796400 | -3.35928100 | -1.32627000 |
| C  | -7.22738800 | -1.36248300 | -0.26354400 | -7.18001000 | -1.50684200 | -0.26329100 |
| H  | -8.30185000 | -1.46465800 | -0.15276700 | -8.25242400 | -1.62961700 | -0.15352200 |
| C  | -6.58052800 | -0.23507100 | 0.23219100  | -6.55237500 | -0.37729100 | 0.25188700  |

|   |             |             |             |             |             |             |
|---|-------------|-------------|-------------|-------------|-------------|-------------|
| H | -7.14683600 | 0.54479500  | 0.73065500  | -7.13165900 | 0.38362100  | 0.76454000  |
| C | -5.20392200 | -0.09829700 | 0.09429500  | -5.17852800 | -0.21395400 | 0.11523700  |
| H | -4.67910500 | 0.77183700  | 0.47267600  | -4.66864400 | 0.65837900  | 0.50861200  |
| C | -0.93937700 | 2.78283200  | -2.03714500 | -1.06653400 | 2.74358400  | -2.02541000 |
| C | -2.27579600 | 2.47746600  | -2.26022100 | -2.39244400 | 2.38469200  | -2.22992100 |
| H | -2.64910900 | 1.48583600  | -2.02684900 | -2.71853000 | 1.37505100  | -2.00370400 |
| C | -3.11434200 | 3.45930900  | -2.77541000 | -3.28059000 | 3.33616500  | -2.71805600 |
| H | -4.16100900 | 3.22966400  | -2.94735800 | -4.31929000 | 3.06397900  | -2.87561100 |
| C | -2.61698900 | 4.72484300  | -3.07089000 | -2.84277400 | 4.62548900  | -3.00489100 |
| H | -3.27504900 | 5.48763900  | -3.47389600 | -3.53946400 | 5.36462100  | -3.38650000 |
| C | -1.27217700 | 5.00675300  | -2.85401000 | -1.50743700 | 4.96124000  | -2.80739800 |
| H | -0.87605400 | 5.98957200  | -3.08827200 | -1.15699800 | 5.96266400  | -3.03564800 |
| C | -0.42281700 | 4.03551100  | -2.33442600 | -0.60861700 | 4.02055600  | -2.31548400 |
| H | 0.62736700  | 4.24073400  | -2.15772700 | 0.43503200  | 4.26835500  | -2.15587600 |
| C | 1.93684700  | 3.09496600  | 0.13897400  | 1.85002200  | 3.16133600  | 0.08618100  |
| C | 2.88638600  | 2.94109900  | -0.86231400 | 2.74045200  | 3.07773800  | -0.97618400 |
| H | 3.06652700  | 1.96036700  | -1.28974200 | 2.92120800  | 2.12284400  | -1.45758300 |
| C | 3.59544400  | 4.05552900  | -1.29607400 | 3.38717900  | 4.23058800  | -1.40703700 |
| H | 4.33703100  | 3.94314300  | -2.08033200 | 4.08110600  | 4.17250300  | -2.23931400 |
| C | 3.36091700  | 5.30336600  | -0.72675800 | 3.15037300  | 5.44738600  | -0.77522900 |
| H | 3.91754900  | 6.17017300  | -1.06757100 | 3.65822000  | 6.34437900  | -1.11402200 |
| C | 2.41748700  | 5.43391000  | 0.28701500  | 2.26626100  | 5.50814300  | 0.29691600  |
| H | 2.23581500  | 6.40228600  | 0.74201800  | 2.08249800  | 6.45213500  | 0.79977600  |
| C | 1.69798100  | 4.32832700  | 0.72760200  | 1.60920400  | 4.36359100  | 0.73557900  |
| H | 0.95980500  | 4.41526600  | 1.51701300  | 0.91789800  | 4.39681700  | 1.57018300  |
| C | -1.37703100 | 2.82193600  | 1.56662200  | -1.40824000 | 2.77745900  | 1.58639700  |
| C | -0.89930400 | 2.67505800  | 2.86156100  | -0.90445200 | 2.64058400  | 2.87248200  |
| H | -0.43039400 | 1.74315500  | 3.16071200  | -0.40831900 | 1.71972000  | 3.16173700  |
| C | -1.03426900 | 3.73593100  | 3.74974800  | -1.05052000 | 3.69636600  | 3.76513600  |
| H | -0.66012100 | 3.63190700  | 4.76313600  | -0.65650200 | 3.60016200  | 4.77176000  |
| C | -1.64526800 | 4.91961000  | 3.34655200  | -1.69830000 | 4.86474600  | 3.37499200  |
| H | -1.74793800 | 5.74397000  | 4.04466700  | -1.80951800 | 5.68524700  | 4.07633800  |
| C | -2.12931000 | 5.04076200  | 2.04807500  | -2.20902000 | 4.97511000  | 2.08574500  |
| H | -2.61173200 | 5.95892600  | 1.72862100  | -2.72090900 | 5.88087200  | 1.77694200  |
| C | -1.99699700 | 3.98971800  | 1.14660900  | -2.06647900 | 3.92909800  | 1.18013300  |
| H | -2.36295600 | 4.06915100  | 0.12884500  | -2.45365100 | 4.00018700  | 0.16964000  |
| C | 6.45873100  | 0.30673900  | 0.03899300  | 6.43142700  | 0.48194600  | 0.06901000  |
| H | 5.93241600  | 1.22942200  | 0.30237100  | 5.86895300  | 1.38296200  | 0.33072400  |
| H | 7.48472900  | 0.38294100  | 0.41345700  | 7.44525200  | 0.58714100  | 0.46677800  |
| H | 6.49564900  | 0.23691000  | -1.05098700 | 6.49049700  | 0.41908500  | -1.01953600 |
| C | 6.54082400  | -2.18177200 | 0.26019000  | 6.59773600  | -2.00890500 | 0.26520800  |
| H | 7.56950200  | -2.12079000 | 0.63001600  | 7.61444700  | -1.91341600 | 0.65789000  |
| H | 6.07873100  | -3.07529200 | 0.69113200  | 6.16031700  | -2.92358100 | 0.67590400  |
| H | 6.57271800  | -2.30716600 | -0.82474300 | 6.65326100  | -2.11387600 | -0.82010200 |
| C | 5.71333600  | -0.78395800 | 2.16213500  | 5.70043600  | -0.65895300 | 2.17808200  |
| H | 5.16656000  | 0.11158700  | 2.46776100  | 5.12301400  | 0.21544100  | 2.48719200  |
| H | 5.22576800  | -1.64580200 | 2.62493300  | 5.23822600  | -1.54150300 | 2.62683200  |
| H | 6.73090500  | -0.71391100 | 2.55897300  | 6.71117800  | -0.56021400 | 2.58442900  |
